# Supplementary material for: Low Levels of IgM and IgA Recognizing Acetylated C1-Inhibitor Peptides Are Associated with Systemic Lupus Erythematosus in Taiwanese Women
Source: MDPI journal article supplement (doi:10.3390/molecules24091645), 2019-04-26
Supplement: s1 [file s1]

# Acetylation-protein Adducts

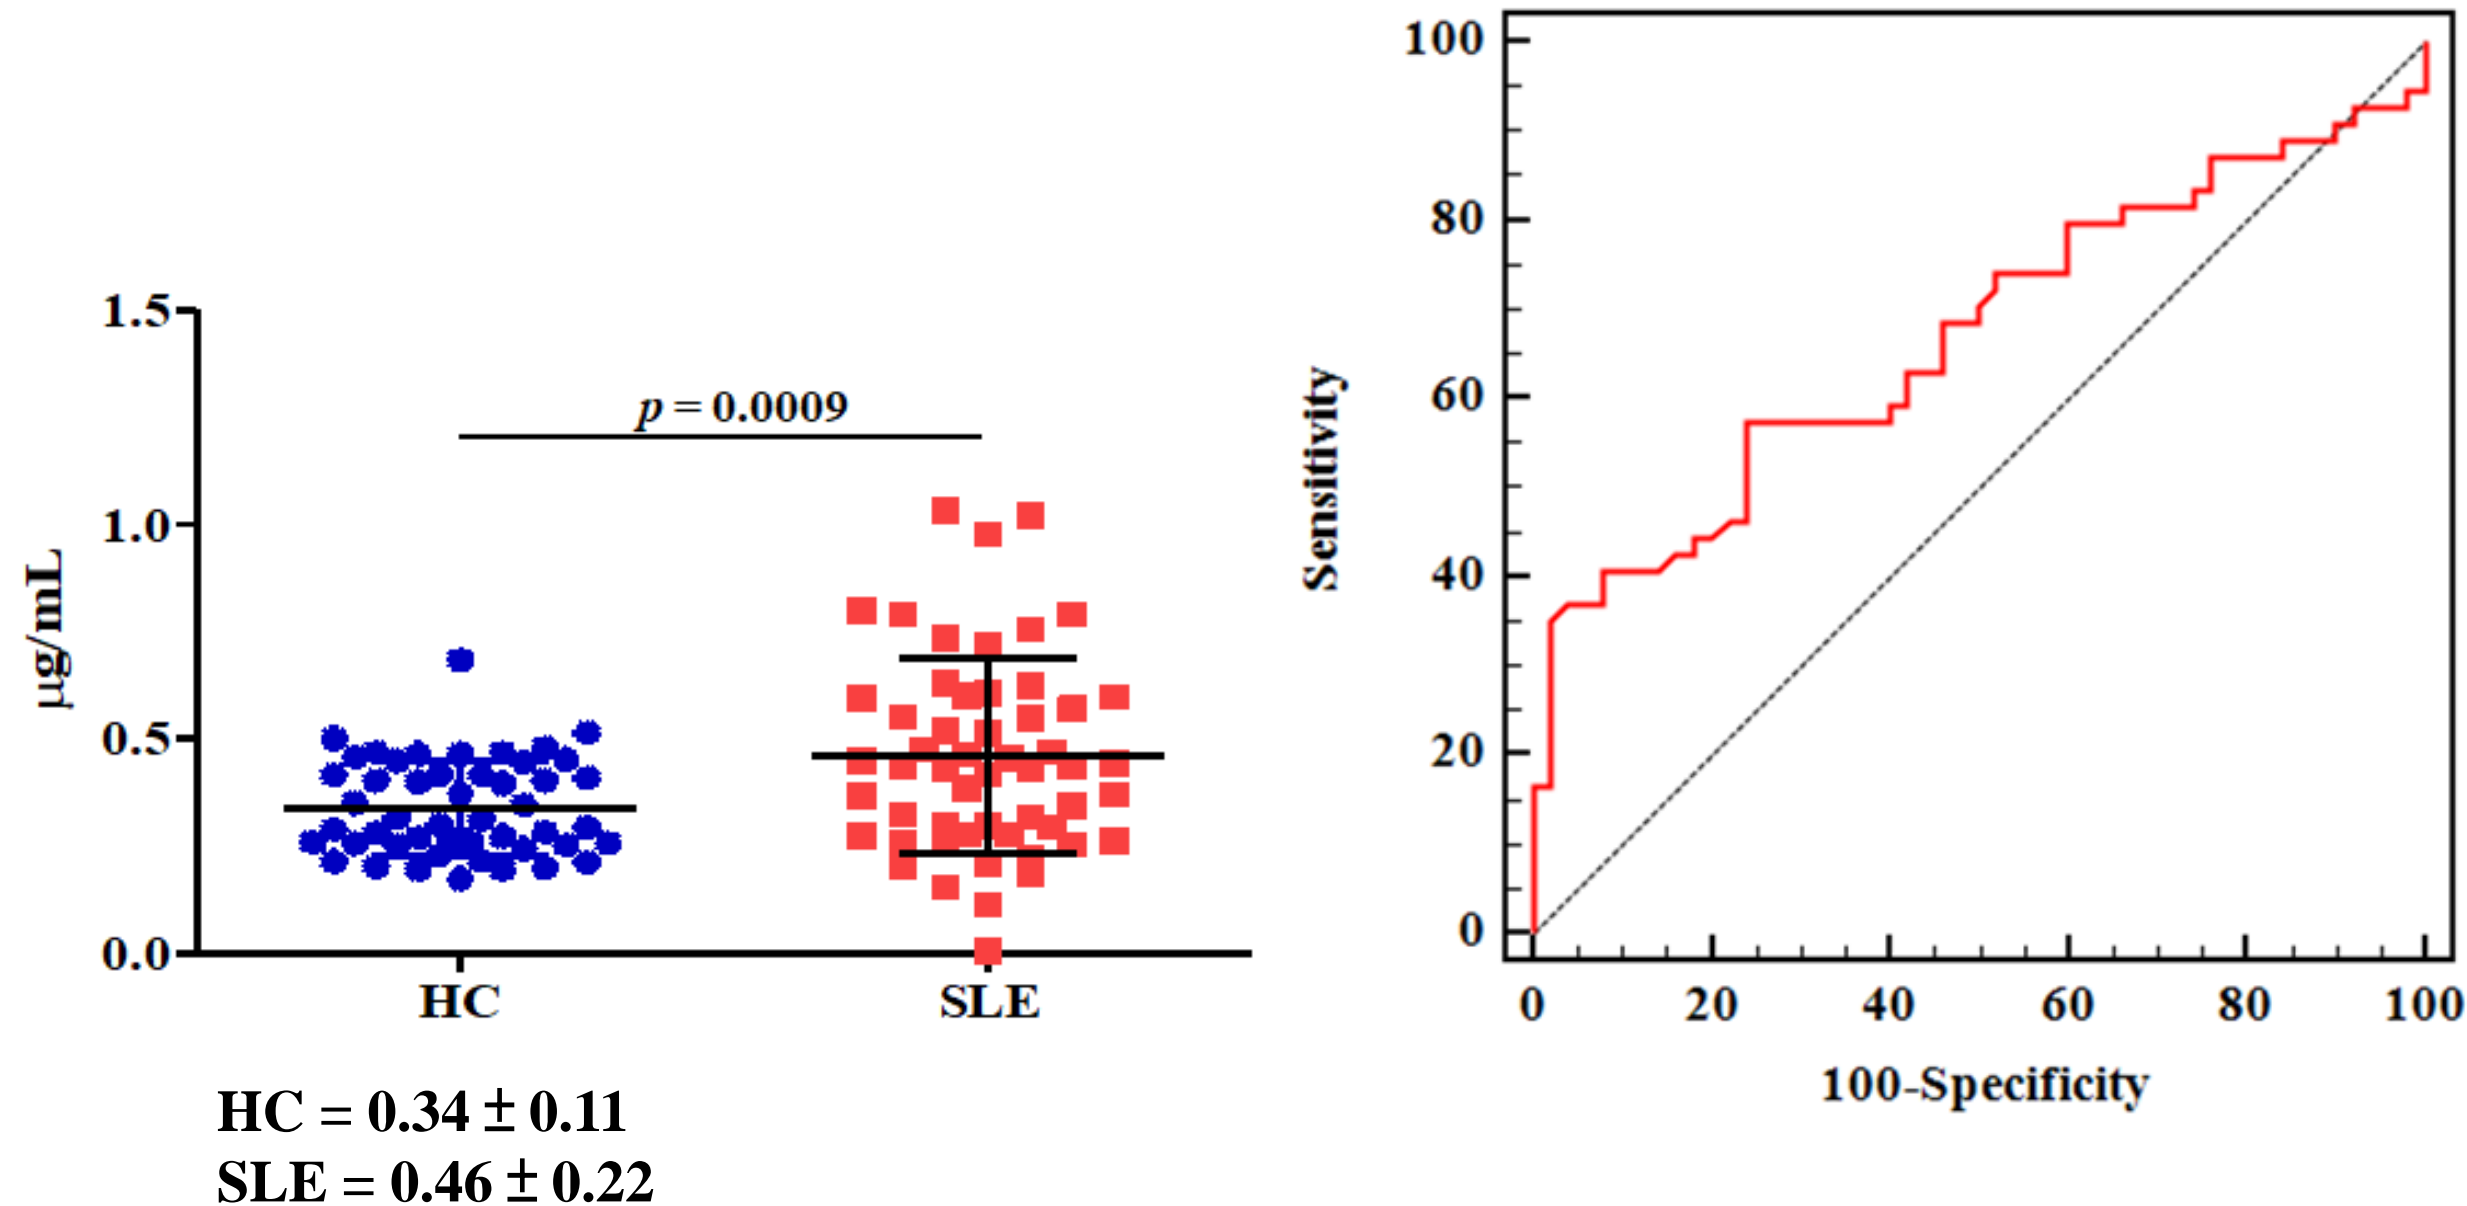

|                             | AUC (95% CI)      | Sensitivity (95% CI) | Specificity (95% CI) |
|-----------------------------|-------------------|----------------------|----------------------|
| Acetylation-protein Adducts | 0.67 (0.57, 0.76) | 70.4% (56.4, 82.0)   | 50.0% (35.5, 64.5)   |
| Cut-off value: 0.299        |                   |                      |                      |
