# Supplementary material for: Low Levels of IgM and IgA Recognizing Acetylated C1-Inhibitor Peptides Are Associated with Systemic Lupus Erythematosus in Taiwanese Women
Source: MDPI journal article supplement (doi:10.3390/molecules24091645), 2019-04-26
Supplement: s1 [file s1]

Supplementary Table 2

|                                 | HC <sup>a</sup>   | SLE <sup>b</sup> | RA <sup>b</sup> |
|---------------------------------|-------------------|------------------|-----------------|
| Characteristic                  | (n = 50)          | (n = 54)         | (n = 40)        |
| <b>Age <sup>c</sup></b>         | 42.00 ± 8.41      | 41.17 ± 11.65    | 54.85 ± 10.66   |
| <b>Gender</b>                   |                   |                  |                 |
| Female                          | 50                | 54               | 40              |
| <b>Disease duration (years)</b> | N.A. <sup>d</sup> | 7.13 ± 7.00      | N.A.            |
| <b>SLEDAI</b>                   | N.A.              | 8.88 ± 5.54      | N.A.            |
| <b>Current therapy</b>          |                   |                  |                 |
| NSAIDs (%)                      | N.A.              | 27.80            | N.A.            |
| DMARDs (%)                      | N.A.              | 94.40            | N.A.            |
| Other (e.g. steroids) (%)       | N.A.              | 68.52            | N.A.            |
| <b>Clinical tests</b>           |                   |                  |                 |
| Anti-ds DNA - positive (%)      | N.A.              | 52.80            | 0.0             |
| Anti-Sm - positive (%)          | N.A.              | 20.00            | 0.0             |
| ANA - positive (%)              | 0.0               | 82.61            | 47.5            |
| RF - positive (%)               | 0.0               | 7.69             | 72.5            |
| Anti-Ro (SSA) - positive (%)    | 0.0               | 46.00            | 5.0             |
| Anti-La (SSB) – positive (%)    | 0.0               | 16.00            | 0.0             |
| CRP – positive (%)              | N.A.              | 25.00            | 37.5            |
| ESR – positive (%)              | N.A.              | 69.23            | 87.5            |

a. HCs were tested by Union Clinical Laboratory in Taiwan: Rheumatoid factor (Latex RF reagent, Siemens Medical Solutions Diagnostics, USA; cutoff of < 15.0 IU/mL), ANA (FLUORO HEPANA Test, Medical & Biological Laboratories, Japan), SSA (BioPlex 2200 ANA, Bio-Rad Laboratories, Hercules, CQA, USA; cutoff of < 100 AU/mL), and SSB (BioPlex 2200 ANA, Bio-Rad Laboratories; cutoff of < 100 AU/mL).

b. Patient samples were analyzed at the Department of Laboratory Medicine, Shuang-Ho Hospital, Taiwan: Rheumatoid factor (Latex RF reagent, Siemens Medical Solutions Diagnostics; cutoff of < 15.0 IU/mL), ANA (FLUORO HEPANA Test, Medical & Biological Laboratories, Japan), SSA (EliA™ Ro FLUOROENZYMEIMMUNOASSAY, Phadia GmbH, Freiburg, Germany; cutoff of < 7.0 IU/mL), and SSB (EliA™ La FLUOROENZYMEIMMUNOASSAY, Phadia GmbH; cutoff of < 7.0 IU/mL), anti-dsDNA:(EliA™ ds DNA FLUOROENZYMEIMMUNOASSAY, Phadia GmbH, Freiburg, Germany; cutoff of < 10 IU/mL), anti-Sm:(EliA™ SmD<sup>P</sup> FLUOROENZYMEIMMUNOASSAY, Phadia GmbH, Freiburg, Germany; cutoff of < 7.0 IU/mL), CRP (CardioPhase® hsCRP, SIEMENS, Munich, Germany; cutoff of < 0.5 mg/dL) and ESR (VACUETTE®, Greiner Bio-One, Kremsmünster, Austria; cutoff of < 10 mm/1 hr).

c. HC vs. RA,  $p < 0.0001$ ; SLE vs. RA,  $p < 0.0001$ .

d. N.A., Not available.
