# Supplementary material for: Low Levels of IgM and IgA Recognizing Acetylated C1-Inhibitor Peptides Are Associated with Systemic Lupus Erythematosus in Taiwanese Women
Source: Molecules. 2019 Apr 26;24(9):1645. doi: 10.3390/molecules24091645 (PMC6539680; doi:10.3390/molecules24091645)
Supplement: Supplementary file 1 [file molecules-24-01645-s001.zip]

Archive with 6 entries (6 files):
- 2 Supplementary Figure 1 Ac-protein Adducts v1.1.pdf
- 2 Supplementary Figure 1 Flow chart.pdf
- 2 Supplementary Figure 2 Ac-protein Adducts v1.1.pdf
- 2 Supplementary information 20181021 v1.0.pdf
- 2 Supplementary Table 1 20181021 v1.0 HC-SLE peptide.xlsx
- 2 Supplementary Table 2 20181021 v1.0.pdf
