# Supplementary material for: Low Levels of IgM and IgA Recognizing Acetylated C1-Inhibitor Peptides Are Associated with Systemic Lupus Erythematosus in Taiwanese Women
Source: Molecules. 2019 Apr 26;24(9):1645. doi: 10.3390/molecules24091645 (PMC6539680; doi:10.3390/molecules24091645)
Supplement: Supplementary file 1 [file molecules-24-01645-s001.zip › 2 Supplementary Table 1 20181021 v1.0 HC-SLE peptide.xlsx]

## Sheet: 工作表1
Supplementary Table 1
	Protein Accession	Peptide	Unique	-10lgP	Mass	ppm	m/z	z	RT	Scan	#Spec	Start	End	PTM
HC1	P05155|IC1_HUMAN	R.LEDMEQALSPSVFK.A	Y	75.01	1592.78	0.1	797.395	2	45.53	6481	3	367	380
	P05155|IC1_HUMAN	R.IKVTTSQDMLSIMEK.L	Y	64.38	1722.89	0	862.452	2	40.23	5620	4	401	415
	P05155|IC1_HUMAN	K.GVTSVSQIFHSPDLAIR.D	Y	63.59	1825.97	0.1	913.992	2	45.51	6477	3	217	233
	P05155|IC1_HUMAN	K.HRLEDMEQALSPSVFK.A	Y	62.11	1885.94	-0.3	629.652	3	39.59	5510	2	365	380
	P05155|IC1_HUMAN	K.TNLESILSYPK.D	Y	59.39	1263.67	-0.1	632.843	2	43.73	6187	2	191	201
	P05155|IC1_HUMAN	K.VTTSQDMLSIMEK.L	Y	59.13	1481.71	-0.3	741.862	2	40.44	5655	2	403	415
	P05155|IC1_HUMAN	R.LVLLNAIYLSAK.W	Y	57.76	1316.81	-0.8	659.41	2	52.8	7546	2	287	298
	P05155|IC1_HUMAN	K.LYHAFSAMK.K	Y	56.86	1066.53	0.4	534.271	2	21.87	2468	4	153	161
	P05155|IC1_HUMAN	K.VTTSQDM(+15.99)LSIMEK.L	Y	55.4	1497.71	-0.7	749.86	2	28.66	3650	2	403	415	Oxidation (M)
	P05155|IC1_HUMAN	R.LLDSLPSDTR.L	Y	55.25	1115.58	-1.4	558.798	2	27.34	3418	3	277	286
	P05155|IC1_HUMAN	K.VTTSQDM(+15.99)LSIM(+15.99)EK.L	Y	54.36	1513.7	0.1	757.857	2	22.02	2496	2	403	415	Oxidation (M)
	P05155|IC1_HUMAN	K.DFTC(+105.06)VHQALK.G	Y	54.08	1265.62	0.1	633.819	2	20.21	2186	6	202	211	S-pyridylethylation
	P05155|IC1_HUMAN	K.YPVAHFIDQTLK.A	Y	51.69	1430.76	-0.7	477.925	3	37.1	5091	4	330	341
	P05155|IC1_HUMAN	K.FPVFMGR.V	Y	51.58	852.432	0.8	427.223	2	35.57	4832	2	488	494
	P05155|IC1_HUMAN	K.KYPVAHFIDQTLK.A	Y	51.48	1558.85	0.1	780.433	2	33.18	4440	5	329	341
	P05155|IC1_HUMAN	R.TLYSSSPR.V	Y	50.17	909.456	-0.4	455.735	2	13.13	1145	2	242	249
	P05155|IC1_HUMAN	R.IKVTTSQDM(+15.99)LSIMEK.L	Y	48.32	1738.88	-0.9	580.635	3	31.31	4113	2	401	415	Oxidation (M)
	P05155|IC1_HUMAN	R.LEDM(+15.99)EQALSPSVFK.A	Y	46.25	1608.77	-0.2	805.392	2	35.91	4892	2	367	380	Oxidation (M)
	P05155|IC1_HUMAN	K.FPVFM(+15.99)GR.V	Y	45.68	868.427	0.2	435.221	2	28.28	3587	2	488	494	Oxidation (M)
	P05155|IC1_HUMAN	K.FQPTLLTLPR.I	Y	42.23	1184.69	0.3	593.353	2	43.96	6225	4	391	400
	P05155|IC1_HUMAN	R.IKVTTSQDM(+15.99)LSIM(+15.99)EK.L	Y	41.22	1754.88	-0.8	585.967	3	26.98	3356	1	401	415	Oxidation (M)
	P05155|IC1_HUMAN	K.LYHAFSAM(+15.99)K.K	Y	32.74	1082.52	0.1	361.848	3	16.39	1570	2	153	161	Oxidation (M)
	P05155|IC1_HUMAN	R.MEPFHFK.N	Y	29.34	934.437	-0.5	312.486	3	26.11	3197	3	310	316
	P05155|IC1_HUMAN	K.NSVIKVPMMNSK.K	Y	24.73	1346.71	-0.1	449.909	3	29.61	3816	1	317	328
	P05155|IC1_HUMAN	R.M(+15.99)EPFHFK.N	Y	20.93	950.432	-0.1	317.818	3	20.65	2259	2	310	316	Oxidation (M)
HC2	P05155|IC1_HUMAN	K.TNLESILSYPK.D	Y	69.35	1263.67	0.4	632.843	2	43.74	6324	2	191	201
	P05155|IC1_HUMAN	K.HRLEDMEQALSPSVFK.A	Y	67.16	1885.94	0	629.653	3	39.72	5671	2	365	380
	P05155|IC1_HUMAN	K.VTTSQDM(+15.99)LSIMEK.L	Y	66.83	1497.71	0.3	749.86	2	28.72	3796	2	403	415	Oxidation (M)
	P05155|IC1_HUMAN	K.VTTSQDM(+15.99)LSIM(+15.99)EK.L	Y	66.38	1513.7	0	757.857	2	22.03	2632	2	403	415	Oxidation (M)
	P05155|IC1_HUMAN	K.GVTSVSQIFHSPDLAIR.D	Y	64.18	1825.97	0.2	913.992	2	45.48	6600	4	217	233
	P05155|IC1_HUMAN	R.LLDSLPSDTR.L	Y	61.74	1115.58	-3.6	558.796	2	27.42	3570	3	277	286
	P05155|IC1_HUMAN	K.VTTSQDMLSIMEK.L	Y	59.52	1481.71	-0.2	741.862	2	40.46	5794	2	403	415
	P05155|IC1_HUMAN	R.IKVTTSQDMLSIMEK.L	Y	58.72	1722.89	-0.3	575.304	3	40.31	5767	2	401	415
	P05155|IC1_HUMAN	K.LYHAFSAMK.K	Y	58	1066.53	0.3	534.271	2	21.88	2602	4	153	161
	P05155|IC1_HUMAN	K.DFTC(+105.06)VHQALK.G	Y	57.13	1265.62	0.5	633.819	2	20.24	2316	6	202	211	S-pyridylethylation
	P05155|IC1_HUMAN	K.KYPVAHFIDQTLK.A	Y	56.34	1558.85	0.9	780.433	2	33.83	4685	4	329	341
	P05155|IC1_HUMAN	R.LEDM(+15.99)EQALSPSVFK.A	Y	54.41	1608.77	0.1	805.393	2	35.96	5047	2	367	380	Oxidation (M)
	P05155|IC1_HUMAN	K.FPVFMGR.V	Y	53.67	852.432	-0.2	427.223	2	35.68	4997	2	488	494
	P05155|IC1_HUMAN	R.TLYSSSPR.V	Y	49.55	909.456	0.3	455.735	2	13	1175	2	242	249
	P05155|IC1_HUMAN	K.YPVAHFIDQTLK.A	Y	49.03	1430.76	0.6	716.386	2	37.67	5331	3	330	341
	P05155|IC1_HUMAN	K.FQPTLLTLPR.I	Y	47.78	1184.69	0	593.353	2	44.05	6372	3	391	400
	P05155|IC1_HUMAN	R.LVLLNAIYLSAK.W	Y	40.69	1316.81	-0.2	659.41	2	52.94	7701	2	287	298
	P05155|IC1_HUMAN	K.FPVFM(+15.99)GR.V	Y	40.11	868.427	-0.7	435.22	2	28.8	3811	2	488	494	Oxidation (M)
	P05155|IC1_HUMAN	K.TTFDPK.K	Y	35.6	707.349	0.1	354.682	2	11.41	1007	2	301	306
	P05155|IC1_HUMAN	R.LEDMEQALSPSVFK.A	Y	29.7	1592.78	-1	797.394	2	45.3	6573	2	367	380
	P05155|IC1_HUMAN	R.M(+15.99)EPFHFK.N	Y	26.42	950.432	0.1	317.818	3	20.61	2381	2	310	316	Oxidation (M)
	P05155|IC1_HUMAN	R.MEPFHFK(+42)NSVIK(+42)VPMMNSK.K	Y	54.41	2379.14	7.113	794.053	3	48.856	4461	1	310	328	Acetylation
	P05155|IC1_HUMAN	R.MEPFHFK.N	Y	24.96	934.437	1	468.226	2	26.23	3355	3	310	316
HC3	P05155|IC1_HUMAN	R.LEDM(+15.99)EQALSPSVFK.A	Y	90.85	1608.77	0.1	805.393	2	35.81	5013	3	367	380	Oxidation (M)
	P05155|IC1_HUMAN	K.VETNM(+15.99)AFSPFSIASLLTQVLLGAGENTK.T	Y	89.61	2953.51	-0.2	1477.76	2	89.57	12093	4	163	190	Oxidation (M)
	P05155|IC1_HUMAN	R.IKVTTSQDMLSIMEK.L	Y	87.58	1722.89	-0.2	862.452	2	40.11	5735	3	401	415
	P05155|IC1_HUMAN	K.VETNMAFSPFSIASLLTQVLLGAGENTK.T	Y	86.11	2937.52	0.2	1469.77	2	92.46	12361	4	163	190
	P05155|IC1_HUMAN	K.GVTSVSQIFHSPDLAIR.D	Y	76.86	1825.97	0.3	913.992	2	45.42	6586	3	217	233
	P05155|IC1_HUMAN	K.HRLEDMEQALSPSVFK.A	Y	74.82	1885.94	-0.9	943.974	2	39.74	5674	4	365	380
	P05155|IC1_HUMAN	K.VTTSQDMLSIMEK.L	Y	74.65	1481.71	0.1	741.863	2	40.22	5755	2	403	415
	P05155|IC1_HUMAN	K.TNLESILSYPK.D	Y	70.78	1263.67	0.2	632.843	2	43.56	6291	2	191	201
	P05155|IC1_HUMAN	R.IKVTTSQDMLSIM(+15.99)EK.L	Y	69.17	1738.88	0.3	870.45	2	31.64	4294	1	401	415	Oxidation (M)
	P05155|IC1_HUMAN	K.HRLEDM(+15.99)EQALSPSVFK.A	Y	68.88	1901.93	-0.1	951.972	2	30.13	4025	4	365	380	Oxidation (M)
	P05155|IC1_HUMAN	K.VTTSQDM(+15.99)LSIM(+15.99)EK.L	Y	68	1513.7	0.4	757.858	2	21.95	2621	2	403	415	Oxidation (M)
	P05155|IC1_HUMAN	R.IKVTTSQDM(+15.99)LSIM(+15.99)EK.L	Y	66.18	1754.88	-0.6	585.967	3	26.81	3446	3	401	415	Oxidation (M)
	P05155|IC1_HUMAN	K.KYPVAHFIDQTLK.A	Y	65.09	1558.85	-0.6	780.432	2	32.94	4528	5	329	341
	P05155|IC1_HUMAN	K.LYHAFSAMK.K	Y	64.83	1066.53	0.5	534.271	2	21.95	2620	4	153	161
	P05155|IC1_HUMAN	K.VTTSQDM(+15.99)LSIMEK.L	Y	62.36	1497.71	-0.3	749.86	2	28.36	3715	2	403	415	Oxidation (M)
	P05155|IC1_HUMAN	R.LVLLNAIYLSAK.W	Y	60.86	1316.81	-0.1	659.411	2	52.9	7701	3	287	298
	P05155|IC1_HUMAN	R.IKVTTSQDM(+15.99)LSIMEK.L	Y	58.09	1738.88	-0.1	580.635	3	31.02	4183	3	401	415	Oxidation (M)
	P05155|IC1_HUMAN	K.FPVFMGR.V	Y	57.84	852.432	0.7	427.223	2	35.39	4941	2	488	494
	P05155|IC1_HUMAN	K.LYHAFSAM(+15.99)K.K	Y	56.7	1082.52	-0.4	542.268	2	16.19	1648	5	153	161	Oxidation (M)
	P05155|IC1_HUMAN	K.DFTC(+105.06)VHQALK.G	Y	56.29	1265.62	0.8	633.819	2	20.33	2345	4	202	211	S-pyridylethylation
	P05155|IC1_HUMAN	R.LLDSLPSDTR.L	Y	55.33	1115.58	-1.3	558.798	2	25.93	3293	6	277	286
	P05155|IC1_HUMAN	K.YPVAHFIDQTLK.A	Y	55.14	1430.76	-0.2	477.926	3	37.17	5236	4	330	341
	P05155|IC1_HUMAN	K.FQPTLLTLPR.I	Y	49.57	1184.69	0.2	593.353	2	43.91	6345	2	391	400
	P05155|IC1_HUMAN	R.TLYSSSPR.V	Y	49.08	909.456	-1	455.735	2	13	1183	2	242	249
	P05155|IC1_HUMAN	R.LEDMEQALSPSVFK.A	Y	47.1	1592.78	0.6	797.395	2	45.22	6556	2	367	380
	P05155|IC1_HUMAN	R.MEPFHFK.N	Y	35.03	934.437	-0.7	312.486	3	26.22	3343	2	310	316
	P05155|IC1_HUMAN	R.TLLVFEVQQPFLFVLWDQQHK.F	Y	25.01	2614.39	0.2	872.472	3	71.2	10133	1	467	487
	P05155|IC1_HUMAN	R.M(+15.99)EPFHFK.N	Y	20.81	950.432	-0.1	317.818	3	20.59	2387	1	310	316	Oxidation (M)
SLE1	P05155|IC1_HUMAN	K.VTTSQDMLSIMEK.L	Y	73.57	1481.71	0.7	741.863	2	40.42	5696	2	403	415
	P05155|IC1_HUMAN	K.TNLESILSYPK.D	Y	72.16	1263.67	0.4	632.843	2	43.57	6183	3	191	201
	P05155|IC1_HUMAN	K.GVTSVSQIFHSPDLAIR.D	Y	70.99	1825.97	-0.3	913.991	2	45.41	6457	4	217	233
	P05155|IC1_HUMAN	R.IKVTTSQDMLSIMEK.L	Y	70	1722.89	-1	862.451	2	40.23	5666	3	401	415
	P05155|IC1_HUMAN	R.LLDSLPSDTR.L	Y	69.09	1115.58	-0.1	558.798	2	28.11	3669	8	277	286
	P05155|IC1_HUMAN	K.HRLEDMEQALSPSVFK.A	Y	68.46	1885.94	-0.6	629.652	3	39.58	5567	4	365	380
	P05155|IC1_HUMAN	R.LEDM(+15.99)EQALSPSVFK.A	Y	68.17	1608.77	0.2	805.393	2	35.89	4974	3	367	380	Oxidation (M)
	P05155|IC1_HUMAN	R.LEDMEQALSPSVFK(+42)AIMEK.L	Y	68.17	2223.08	2.923	742.034	3	59.227	8346	1	367	385	Acetylation (Ac)
	P05155|IC1_HUMAN	K.VTTSQDM(+15.99)LSIM(+15.99)EK.L	Y	65.55	1513.7	-0.3	757.857	2	21.88	2600	2	403	415	Oxidation (M)
	P05155|IC1_HUMAN	K.HRLEDM(+15.99)EQALSPSVFK.A	Y	64.5	1901.93	-0.3	634.984	3	30.16	4015	2	365	380	Oxidation (M)
	P05155|IC1_HUMAN	K.KYPVAHFIDQTLK.A	Y	62.26	1558.85	-0.5	780.432	2	32.98	4497	7	329	341
	P05155|IC1_HUMAN	K.FPVFMGR.V	Y	59.37	852.432	-0.2	427.223	2	35.52	4913	3	488	494
	P05155|IC1_HUMAN	K.LYHAFSAMK.K	Y	58.26	1066.53	1.5	534.271	2	21.66	2559	2	153	161
	P05155|IC1_HUMAN	K.YPVAHFIDQTLK.A	Y	56.57	1430.76	-0.3	477.926	3	37.03	5153	4	330	341
	P05155|IC1_HUMAN	K.LYHAFSAM(+15.99)K.K	Y	55.12	1082.52	-0.5	542.268	2	16.02	1617	6	153	161	Oxidation (M)
	P05155|IC1_HUMAN	R.IKVTTSQDM(+15.99)LSIM(+15.99)EK.L	Y	54.63	1754.88	-0.9	585.967	3	26.92	3455	1	401	415	Oxidation (M)
	P05155|IC1_HUMAN	R.LEDMEQALSPSVFK.A	Y	53.67	1592.78	-0.6	531.932	3	45.79	6512	3	367	380
	P05155|IC1_HUMAN	R.TLYSSSPR.V	Y	51.15	909.456	-0.8	455.735	2	12.8	1163	2	242	249
	P05155|IC1_HUMAN	K.DFTC(+105.06)VHQALK.G	Y	48.81	1265.62	0.1	633.819	2	20.05	2282	7	202	211	S-pyridylethylation
	P05155|IC1_HUMAN	K.VTTSQDM(+15.99)LSIMEK.L	Y	46.71	1497.71	-0.2	749.86	2	28.59	3749	1	403	415	Oxidation (M)
	P05155|IC1_HUMAN	K.FQPTLLTLPR.I	Y	46.32	1184.69	-0.1	593.353	2	43.92	6236	3	391	400
	P05155|IC1_HUMAN	K.FPVFM(+15.99)GR.V	Y	44.23	868.427	-0.7	435.22	2	28.08	3664	3	488	494	Oxidation (M)
	P05155|IC1_HUMAN	R.IKVTTSQDM(+15.99)LSIMEK.L	Y	41.94	1738.88	0.5	580.636	3	31.29	4211	1	401	415	Oxidation (M)
	P05155|IC1_HUMAN	R.VYDPR.A	Y	40.94	648.323	-0.7	325.169	2	7.93	694	1	495	499
	P05155|IC1_HUMAN	R.IKVTTSQDMLSIM(+15.99)EK.L	Y	36.1	1738.88	-0.5	580.635	3	31.78	4290	1	401	415	Oxidation (M)
	P05155|IC1_HUMAN	R.M(+15.99)EPFHFK.N	Y	35.69	950.432	0.3	476.223	2	20.71	2395	4	310	316	Oxidation (M)
	P05155|IC1_HUMAN	R.MEPFHFK.N	Y	33.95	934.437	0	312.486	3	26.12	3315	4	310	316
	P05155|IC1_HUMAN	K.TTFDPK.K	Y	33.33	707.349	-0.4	354.682	2	11.1	979	2	301	306
SLE2	P05155|IC1_HUMAN	K.GVTSVSQIFHSPDLAIR.D	Y	81.48	1825.97	0.5	913.992	2	45.43	6510	4	217	233
	P05155|IC1_HUMAN	K.VTTSQDMLSIMEK.L	Y	78.78	1481.71	0.1	741.863	2	40.53	5753	2	403	415
	P05155|IC1_HUMAN	R.LEDM(+15.99)EQALSPSVFK.A	Y	77.83	1608.77	-0.1	805.393	2	35.94	5007	2	367	380	Oxidation (M)
	P05155|IC1_HUMAN	K.TNLESILSYPK.D	Y	77.71	1263.67	0.6	632.843	2	43.66	6239	2	191	201
	P05155|IC1_HUMAN	K.VTTSQDM(+15.99)LSIMEK.L	Y	71.18	1497.71	-0.1	749.86	2	28.68	3779	2	403	415	Oxidation (M)
	P05155|IC1_HUMAN	K.VTTSQDM(+15.99)LSIM(+15.99)EK.L	Y	70.18	1513.7	-0.2	757.857	2	21.9	2589	2	403	415	Oxidation (M)
	P05155|IC1_HUMAN	R.LVLLNAIYLSAK.W	Y	69.63	1316.81	-0.4	659.41	2	52.75	7575	2	287	298
	P05155|IC1_HUMAN	R.IKVTTSQDMLSIMEK.L	Y	68.15	1722.89	-0.2	575.304	3	40.18	5697	2	401	415
	P05155|IC1_HUMAN	K.HRLEDMEQALSPSVFK.A	Y	65.95	1885.94	-0.2	629.652	3	39.74	5624	2	365	380
	P05155|IC1_HUMAN	K.YPVAHFIDQTLK.A	Y	64.64	1430.76	0.2	716.385	2	37.3	5226	4	330	341
	P05155|IC1_HUMAN	R.LLDSLPSDTR.L	Y	63.8	1115.58	-0.5	558.798	2	28.19	3696	5	277	286
	P05155|IC1_HUMAN	K.LYHAFSAMK.K	Y	63.1	1066.53	0.4	534.271	2	21.74	2559	4	153	161
	P05155|IC1_HUMAN	K.DFTC(+105.06)VHQALK.G	Y	62.27	1265.62	0.4	633.819	2	20.06	2271	6	202	211	S-pyridylethylation
	P05155|IC1_HUMAN	K.FPVFMGR.V	Y	60.26	852.432	0.3	427.223	2	35.52	4938	2	488	494
	P05155|IC1_HUMAN	R.TLYSSSPR.V	Y	60.17	909.456	-0.8	455.735	2	12.79	1158	2	242	249
	P05155|IC1_HUMAN	K.FPVFM(+15.99)GR.V	Y	54.08	868.427	-0.7	435.22	2	28.12	3683	2	488	494	Oxidation (M)
	P05155|IC1_HUMAN	K.FQPTLLTLPR.I	Y	50.63	1184.69	0.1	593.353	2	44.07	6303	3	391	400
	P05155|IC1_HUMAN	R.LEDMEQALSPSVFK.A	Y	50.44	1592.78	0.4	797.395	2	45.37	6501	2	367	380
	P05155|IC1_HUMAN	K.KYPVAHFIDQTLK.A	Y	49.69	1558.85	-1.4	520.624	3	32.73	4474	4	329	341
	P05155|IC1_HUMAN	K.LYHAFSAM(+15.99)K.K	Y	49.31	1082.52	-1	542.268	2	16.13	1621	2	153	161	Oxidation (M)
	P05155|IC1_HUMAN	R.MEPFHFK.N	Y	42.21	934.437	0.2	468.226	2	26.12	3324	4	310	316
	P05155|IC1_HUMAN	R.VYDPR.A	Y	41.24	648.323	-0.9	325.168	2	7.9	700	1	495	499
	P05155|IC1_HUMAN	R.M(+15.99)EPFHFK.N	Y	40.38	950.432	0.4	476.223	2	20.67	2373	3	310	316	Oxidation (M)
	P05155|IC1_HUMAN	K.TTFDPK.K	Y	30.75	707.349	-0.6	354.682	2	11.06	986	2	301	306
	P05155|IC1_HUMAN	R.IKVTTSQDMLSIM(+15.99)EK.L	Y	27.46	1738.88	0.5	580.636	3	31.86	4325	1	401	415	Oxidation (M)
SLE3	P05155|IC1_HUMAN	R.IKVTTSQDMLSIMEK.L	Y	77.57	1722.89	-0.9	575.303	3	40.12	5521	2	401	415
	P05155|IC1_HUMAN	K.TNLESILSYPK.D	Y	76.82	1263.67	0.2	632.843	2	43.57	6052	2	191	201
	P05155|IC1_HUMAN	K.VTTSQDMLSIMEK.L	Y	74.4	1481.71	-1	741.862	2	40.45	5575	2	403	415
	P05155|IC1_HUMAN	R.LLDSLPSDTR.L	Y	69.41	1115.58	-0.7	558.798	2	28.02	3552	6	277	286
	P05155|IC1_HUMAN	K.VTTSQDM(+15.99)LSIMEK.L	Y	66.86	1497.71	0	749.86	2	28.58	3646	2	403	415	Oxidation (M)
	P05155|IC1_HUMAN	K.VTTSQDM(+15.99)LSIM(+15.99)EK.L	Y	66.31	1513.7	0	757.857	2	21.9	2510	2	403	415	Oxidation (M)
	P05155|IC1_HUMAN	K.FPVFMGR.V	Y	63.74	852.432	-0.5	427.223	2	35.47	4786	2	488	494
	P05155|IC1_HUMAN	R.TLYSSSPR.V	Y	62.66	909.456	-0.6	455.735	2	12.75	1128	2	242	249
	P05155|IC1_HUMAN	K.GVTSVSQIFHSPDLAIR.D	Y	59.65	1825.97	-0.3	913.991	2	45.38	6324	4	217	233
	P05155|IC1_HUMAN	K.LYHAFSAMK.K	Y	58.8	1066.53	1.1	534.271	2	21.7	2472	4	153	161
	P05155|IC1_HUMAN	R.LEDMEQALSPSVFK.A	Y	58.69	1592.78	0.5	797.395	2	45.28	6310	3	367	380
	P05155|IC1_HUMAN	R.LEDMEQALSPSVFK(+42)AIMEK.L	Y	68.17	2223.08	2.923	742.034	3	59.227	8346	1	367	385	Acetylation (Ac)
	P05155|IC1_HUMAN	K.HRLEDMEQALSPSVFK.A	Y	58.13	1885.94	-0.3	629.652	3	39.66	5450	2	365	380
	P05155|IC1_HUMAN	K.DFTC(+105.06)VHQALK.G	Y	56.23	1265.62	0.5	633.819	2	20.03	2195	5	202	211	S-pyridylethylation
	P05155|IC1_HUMAN	R.IKVTTSQDMLSIM(+15.99)EK.L	Y	55.15	1738.88	-0.8	580.635	3	31.78	4179	1	401	415	Oxidation (M)
	P05155|IC1_HUMAN	K.FPVFM(+15.99)GR.V	Y	51.87	868.427	0.1	435.221	2	27.99	3547	2	488	494	Oxidation (M)
	P05155|IC1_HUMAN	K.KYPVAHFIDQTLK.A	Y	51.45	1558.85	-0.8	520.624	3	32.54	4309	4	329	341
	P05155|IC1_HUMAN	R.LEDM(+15.99)EQALSPSVFK.A	Y	50.76	1608.77	0.1	805.393	2	35.88	4854	2	367	380	Oxidation (M)
	P05155|IC1_HUMAN	R.VYDPR.A	Y	50.2	648.323	-0.7	325.169	2	7.95	691	1	495	499
	P05155|IC1_HUMAN	K.YPVAHFIDQTLK.A	Y	48.24	1430.76	-0.1	716.385	2	37.27	5073	4	330	341
	P05155|IC1_HUMAN	K.FQPTLLTLPR.I	Y	47.38	1184.69	0.3	593.353	2	43.97	6112	2	391	400
	P05155|IC1_HUMAN	K.LYHAFSAM(+15.99)K.K	Y	44.79	1082.52	-0.6	361.848	3	16.15	1566	2	153	161	Oxidation (M)
	P05155|IC1_HUMAN	R.MEPFHFK.N	Y	43.67	934.437	-0.3	468.226	2	26.07	3204	4	310	316
	P05155|IC1_HUMAN	R.M(+15.99)EPFHFK.N	Y	36.15	950.432	0.6	476.224	2	20.61	2291	4	310	316	Oxidation (M)
	P05155|IC1_HUMAN	K.TTFDPK.K	Y	31.44	707.349	-0.4	354.682	2	11.01	962	2	301	306
