# Supplementary figures and images for: Low Levels of IgM and IgA Recognizing Acetylated C1-Inhibitor Peptides Are Associated with Systemic Lupus Erythematosus in Taiwanese Women
Source: MDPI journal article supplement (doi:10.3390/molecules24091645), 2019-04-26

**Serum samples: 54 SLE, 40 RA and 50 HCs**

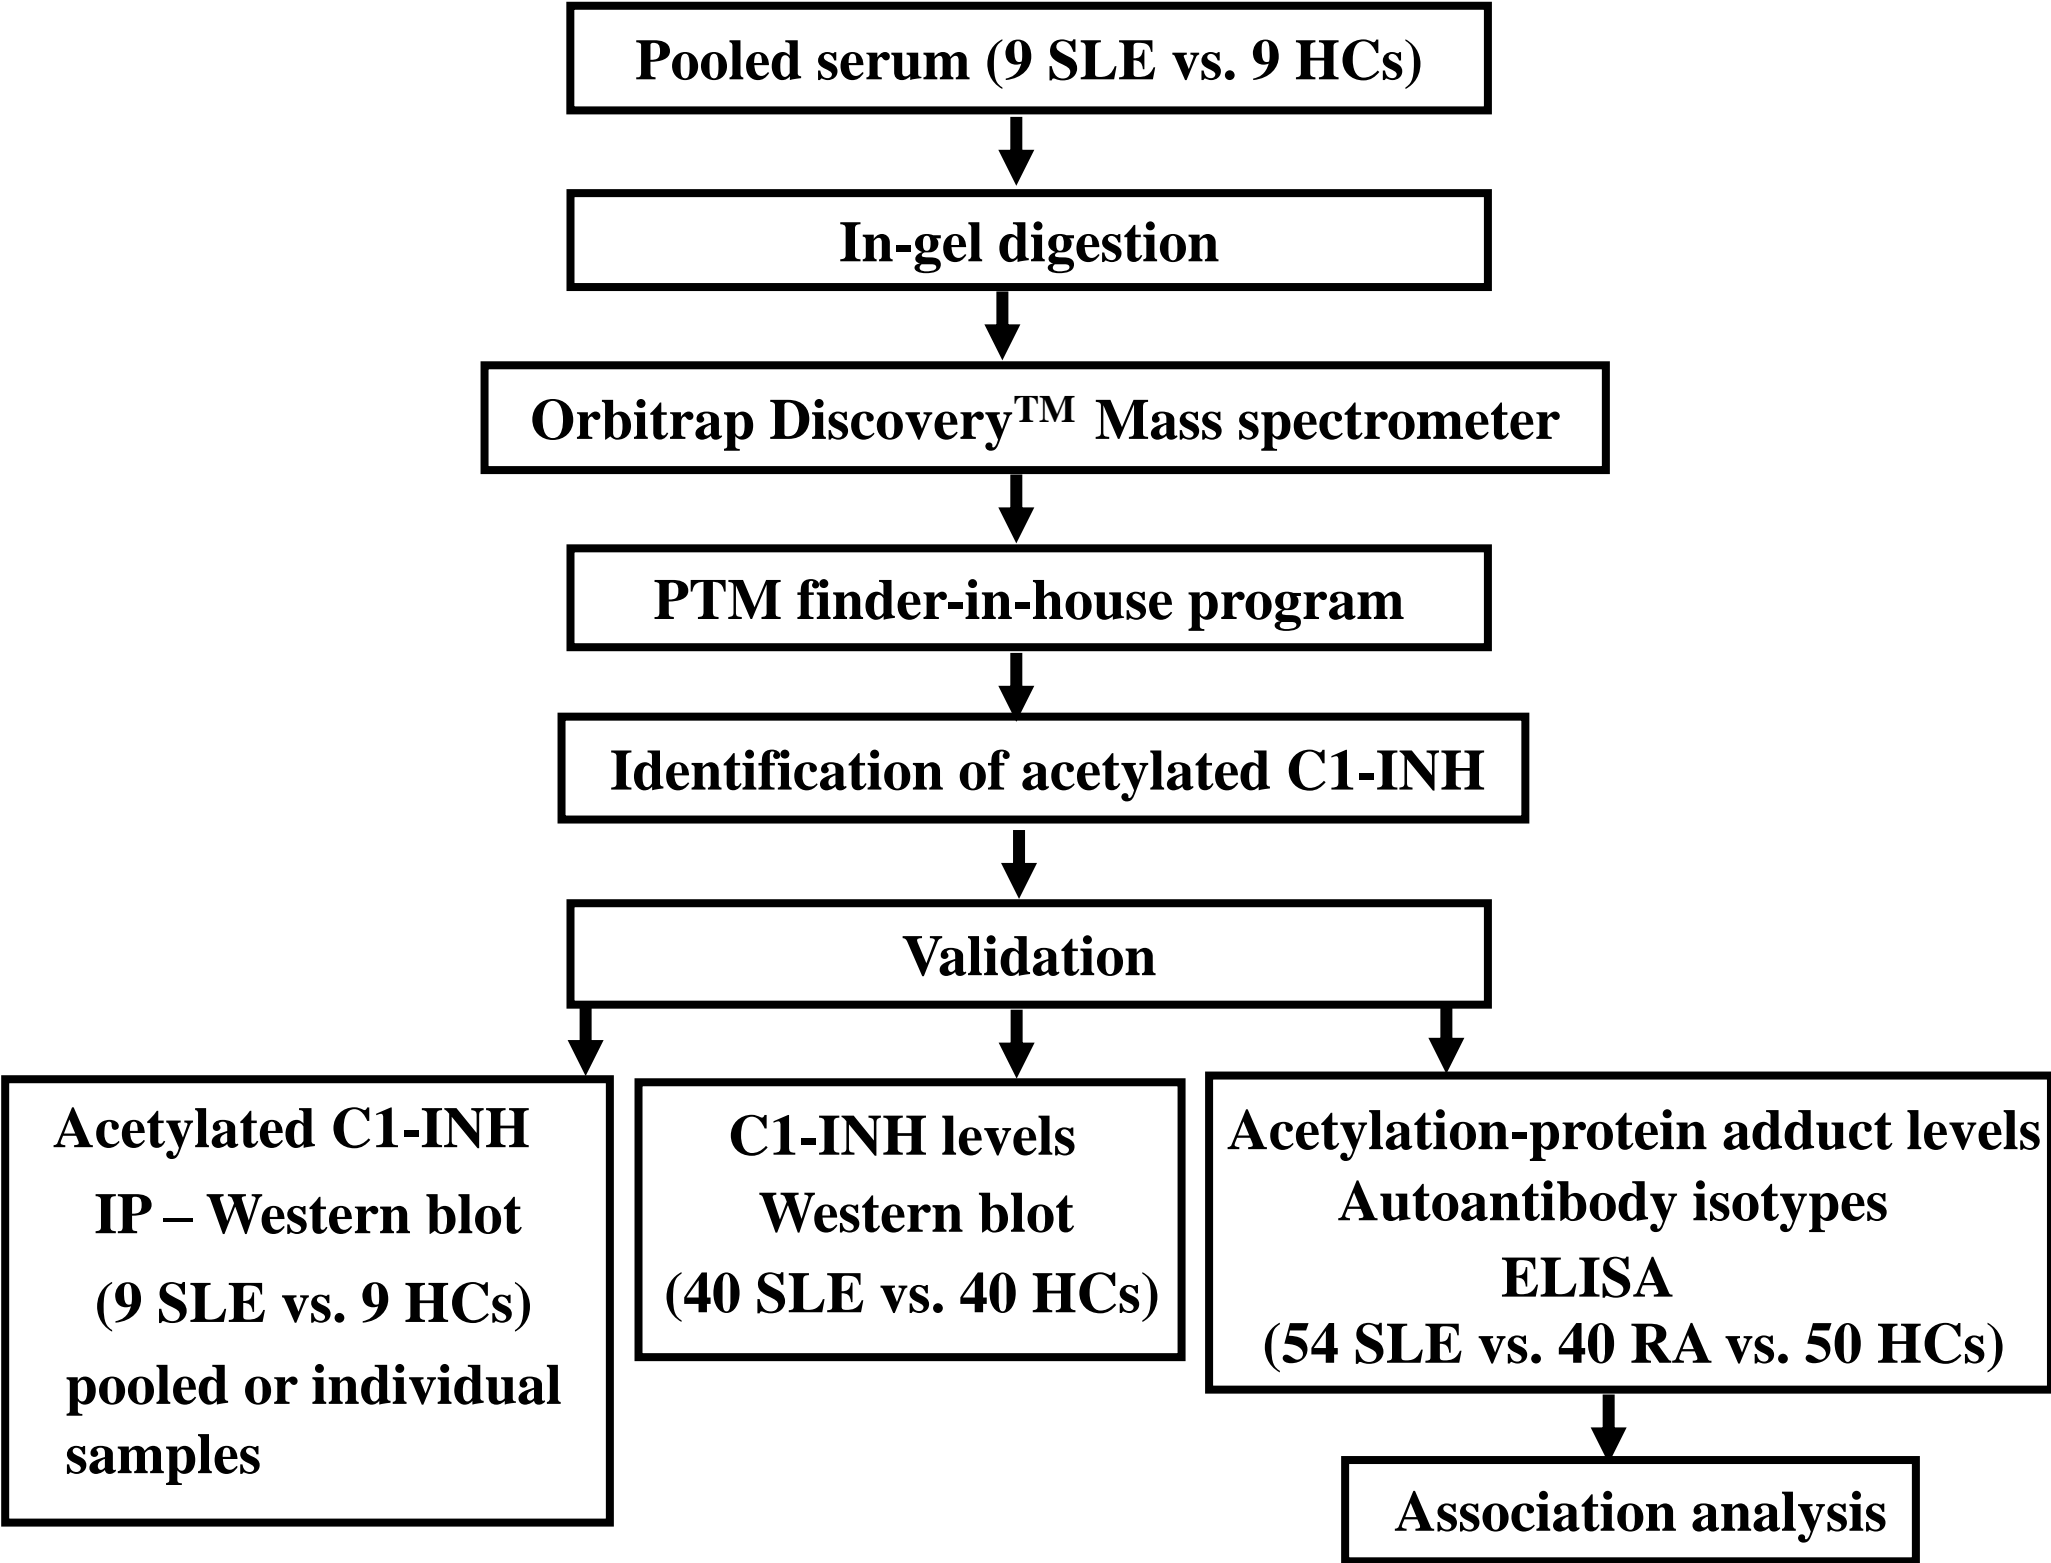

## **Supplementary Figure 1 Flow chart.**

Supplement: s1 [file s1]
